# Supplementary material
Source: ML conference proceedings conference paper supplement (https://proceedings.neurips.cc/paper_files/paper/2012/hash/b20bb95ab626d93fd976af958fbc61ba-Abstract.html)
Supplement: Supplementary file [file b20bb95ab626d93fd976af958fbc61ba-Supplemental.zip]

---

# Learning Manifolds with K-Means and K-Flats: Supplementary Material

---

Guillermo D. Canas<sup>\*,†</sup>      Tomaso Poggio<sup>\*,†</sup>      Lorenzo A. Rosasco<sup>\*,†</sup>

\* Laboratory for Computational and Statistical Learning - MIT-IIT

† CBCL, McGovern Institute - Massachusetts Institute of Technology

guilledc@mit.edu    tp@ai.mit.edu    lrosasco@mit.edu

## A Methodology and Derivation of Results

Although both k-means and k-flats optimize the same empirical risk, the performance measure we are interested in is that of Equation 1. We may bound it from above as follows:

$$\begin{aligned} \mathcal{E}_\rho(S_{n,k}) &\leq |\mathcal{E}_\rho(S_{n,k}) - \mathcal{E}_n(S_{n,k})| + \mathcal{E}_n(S_{n,k}) - \mathcal{E}_n(S_k^*) + |\mathcal{E}_n(S_k^*) - \mathcal{E}_{\rho,k}^*| + \mathcal{E}_{\rho,k}^* \\ &\leq 2 \cdot \underbrace{\sup_{S \in \mathcal{S}_k} |\mathcal{E}_\rho(S) - \mathcal{E}_n(S)|}_{\text{Statistical error}} + \underbrace{\mathcal{E}_{\rho,k}^*}_{\text{Approximation error}} \end{aligned} \quad (14)$$

where  $\mathcal{E}_{\rho,k}^* := \inf_{S \in \mathcal{S}_k} \mathcal{E}_\rho(S)$  is the best attainable performance over  $\mathcal{S}_k$ , and  $S_k^*$  is a set for which the best performance is attained. Note that  $\mathcal{E}_n(S_{n,k}) - \mathcal{E}_n(S_k^*) \leq 0$  by the definition of  $S_{n,k}$ . The same error decomposition can be considered for k-flats, by replacing  $S_{n,k}$  by  $F_{n,k}$  and  $\mathcal{S}_k$  by  $\mathcal{F}_k$ .

Equation 14 decomposes the total learning error into two terms: a uniform (over all sets in the class  $C_k$ ) bound on the difference between the empirical, and true error measures, and an *approximation error* term. The uniform statistical error bound will depend on the samples, and thus may hold with a certain probability.

In this setting, the approximation error will typically tend to zero as the class  $C_k$  becomes larger (as  $k$  increases.) Note that this is true, for instance, if  $C_k$  is the class of discrete sets of size  $k$ , as in the k-means problem.

The performance of Equation 14 is, through its dependence on the samples, a random variable. We will thus set out to find probabilistic bounds on its performance, as a function of the number  $n$  of samples, and the size  $k$  of the approximation. By choosing the approximation size parameter  $k$  to minimize these bounds, we obtain performance bounds as a function of the sample size.

## B K-Means

We use the above decomposition to derive sample complexity bounds for the performance of the k-means algorithm. To derive explicit bounds on the different error terms we have to combine in a novel way some previous results and some new observations.

**Approximation error.** The error  $\mathcal{E}_{\rho,k}^* = \inf_{S_k \in \mathcal{S}_k} \mathcal{E}_\rho(S_k)$  is related to the problem of optimal quantization. The classical optimal quantization problem is quite well understood, going back to the fundamental work of [21, 20] on optimal quantization for data transmission, and more recently by the work of [10, 13, 12, 6]. In particular, it is known that, for distributions with finite moment of order  $2 + \lambda$ , for some  $\lambda > 0$ , it is [10]

$$\lim_{k \rightarrow \infty} \mathcal{E}_{\rho,k}^* \cdot k^{2/d} = C \left\{ \int d\nu(x) p_a(x)^{d/(d+2)} \right\}^{(d+2)/d} \quad (15)$$

where  $\nu$  is the Lebesgue measure,  $p_a$  is the density of the absolutely continuous part of the distribution (according to its Lebesgue decomposition), and  $C$  is a constant that depends only on the dimension. Therefore, the approximation error decays *at least* as fast as  $k^{-2/d}$ .

We note that, by setting  $\mu$  to be the uniform distribution over the unit cube  $[0, 1]^d$ , it clearly is

$$\lim_{k \rightarrow \infty} \mathcal{E}_{\mu,k}^* \cdot k^{2/d} = C$$

and thus, by making use of Zador's asymptotic formula [21], and combining it with a result of Böröczky (see [13], p. 491), we observe that  $C \sim (d/(2\pi e))^{r/2}$  with  $d \rightarrow \infty$ , for the  $r$ -th order quantization problem. In particular, this shows that the constant  $C$  only depends on the dimension, and, in our case ( $r = 2$ ), has only linear growth in  $d$ , a fact that will be used in the sequel.

The approximation error  $\mathcal{E}_{\rho,k}^* = \inf_{S_k \in \mathcal{S}_k} \mathcal{E}_\rho(S_k)$  of  $k$ -means is related to the problem of optimal quantization on manifolds, for which some results are known [12]. By calling  $\mathcal{E}_{\mathcal{M},p,k}^*$  the approximation error only among sets of means contained in  $\mathcal{M}$ , Theorem 1 in Appendix C, implies in this case (letting  $r = 2$ ) that

$$\lim_{k \rightarrow \infty} \mathcal{E}_{\rho,k}^* \cdot k^{2/d} = C \left\{ \int_{\mathcal{M}} d\mu_1(x) p(x)^{d/(d+2)} \right\}^{(d+2)/d} \quad (16)$$

where  $p$  is absolutely continuous over  $\mathcal{M}$  and, by replacing  $\mathcal{M}$  with a  $d$ -dimensional domain in  $\mathbb{R}^d$ , it is clear that the constant  $C$  is the same as above.

Since restricting the means to be on  $\mathcal{M}$  cannot decrease the approximation error, it is  $\mathcal{E}_{\rho,k}^* \leq \mathcal{E}_{\mathcal{M},p,k}^*$ , and therefore the right-hand side of Equation 16 provides an (asymptotic) upper bound to  $\mathcal{E}_{\rho,k}^* \cdot k^{2/d}$ .

For the statistical error we use available bounds.

**Statistical error.** The statistical error of Equation 14, which uniformly bounds the difference between the empirical, and expected error, has been widely-studied in recent years in the literature [16, 17, 3]. In particular, it has been shown that, for a distribution  $p$  over the unit ball in  $\mathbb{R}^d$ , it is

$$\sup_{S \in \mathcal{S}_k} |\mathcal{E}_\rho(S) - \mathcal{E}_n(S)| \leq \frac{k\sqrt{18\pi}}{\sqrt{n}} + \sqrt{\frac{8 \ln 1/\delta}{n}} \quad (17)$$

with probability  $1 - \delta$  [16]. Clearly, this implies convergence  $\mathcal{E}_n(S) \rightarrow \mathcal{E}_\rho(S)$  almost surely, as  $n \rightarrow \infty$ ; although this latter result was proven earlier in [18], under the less restrictive condition that  $p$  have finite second moment.

By bringing together the above results, we obtain the bound in Theorem 1 on the performance of  $k$ -means, whose proof is postponed to Appendix A.

Further, we can consider the error incurred by the actual optimization algorithm used to compute the  $k$ -means solution.

**Computational error.** In practice, the  $k$ -means problem is NP-hard [1, 8, 15], with the original Lloyd relaxation algorithm providing no guarantees of closeness to the global minimum of Equation 2. However, practical approximations, such as the  $k$ -means++ algorithm [2], exist. When using  $k$ -means++, means are inserted one by one at samples selected with probability proportional to their squared distance to the set of previously-inserted means. This randomized seeding has been shown by [2] to output a set that is, in expectation, within a  $8(\ln k + 2)$ -factor of the optimal. Once again, by combining these results, we obtain Theorem 2, whose proof is also in Appendix A.

We use the results discussed in Section A to obtain the proof of Theorem 1 as follows.

*Proof.* Letting  $\|p\|_{d/(d+2)} := \left\{ \int d\mu_1(x) p(x)^{d/(d+2)} \right\}^{(d+2)/d}$ , then with probability  $1 - \delta$ , it is

$$\begin{aligned} \mathcal{E}_\rho(S_{n,k}) &\leq 2n^{-1/2} \left( k\sqrt{18\pi} + \sqrt{8\ln 1/\delta} \right) + Ck^{-2/d} \cdot \|p\|_{d/(d+2)} \\ &\leq 2n^{-1/2} k\sqrt{18\pi} \cdot \sqrt{8\ln 1/\delta} + Ck^{-2/d} \cdot \|p\|_{d/(d+2)} \\ &= 24\sqrt{\pi} k n^{-1/2} \sqrt{\ln 1/\delta} + Ck^{-2/d} \cdot \|p\|_{d/(d+2)} \\ &= 2\sqrt{\ln 1/\delta} n^{-1/(d+2)} C^{d/(d+2)} (24\sqrt{\pi})^{2/(d+2)} \cdot \left\{ \int d\mu_1(x) p(x)^{d/(d+2)} \right\} \end{aligned} \quad (18)$$

where the parameter

$$k_n = n^{\frac{d}{2(d+2)}} \cdot \left( \frac{C}{24\sqrt{\pi}} \right)^{d/(d+2)} \cdot \left\{ \int d\mu_1(x) p(x)^{d/(d+2)} \right\} \quad (19)$$

has been chosen to balance the summands in the third line of Equation 18.  $\square$

The proof of Theorem 2 follows a similar argument.

*Proof.* In the case of Theorem 2, the additional multiplicative term  $A_k = 8(\ln k + 2)$  corresponding to the computational error incurred by the k-means++ algorithm does not affect the choice of parameter  $k_n$  since both summands in the third line of Equation 18 are multiplied by  $A_k$  in this case. Therefore, we may simply use the same choice of  $k_n$  as in Equation 19 in this case to obtain

$$\begin{aligned} \mathbb{E}_Z \mathcal{E}_\rho(S_{n,k}) &\leq 2n^{-1/2} \left( k\sqrt{18\pi} + \sqrt{8\ln 1/\delta} \right) + Ck^{-2/d} \cdot \|p\|_{d/(d+2)} \cdot 8(\ln k + 2) \\ &\leq 16\sqrt{\ln 1/\delta} n^{-1/(d+2)} C^{d/(d+2)} (24\sqrt{\pi})^{2/(d+2)} \cdot \left\{ \int d\mu_1(x) p(x)^{d/(d+2)} \right\} \\ &\quad \cdot \left[ 2 + \frac{d}{d+2} \left( \frac{1}{2} \ln n + \ln \frac{C}{12\sqrt{\pi}} + \ln \|p\|_{d/(d+2)} \right) \right] \end{aligned} \quad (20)$$

with probability  $1 - \delta$ , where the expectation is with respect to the random choice  $Z$  in the algorithm. From this the bound of Theorem 2 follows.  $\square$

## C K-Flats

Here we state a series of lemma that we prove in the next section. For the k-flats problem, we begin by introducing a uniform bound on the difference between empirical (Equation 2) and expected risk (Equation 1.)

**Lemma 1.** *If  $\mathcal{F}_k$  is the class of sets of  $k$   $d$ -dimensional affine spaces then, with probability  $1 - \delta$  on the sampling of  $X_n \sim p$ , it is*

$$\sup_{X' \in \mathcal{F}_k} |\mathcal{E}_\rho(X') - \mathcal{E}_n(X')| \leq k \sqrt{\frac{2\pi d}{n}} + \sqrt{\frac{\ln 1/\delta}{2n}}$$

By combining the above result with approximation error bounds, we may produce performance bounds on the expected risk for the k-flats problem, with appropriate choice of parameter  $k_n$ . We distinguish between the codimension one hypersurface case, and the more general case of a smooth manifold  $\mathcal{M}$  embedded in a Hilbert space. We begin with an approximation error bound for hypersurfaces in Euclidean space.

**Lemma 2.** *Assume given  $\mathcal{M}$  smooth with metric of class  $\mathcal{C}^3$  in  $\mathbb{R}^{d+1}$ . If  $\mathcal{F}_k$  is the class of sets of  $k$   $d$ -dimensional affine spaces, and  $\mathcal{E}_{\rho,k}^*$  is the minimizer of Equation 1 over  $\mathcal{F}_k$ , then there is a constant  $C$  that depends on  $d$  only, such that*

$$\lim_{k \rightarrow \infty} \mathcal{E}_{\rho,k}^* \cdot k^{4/d} \leq C \cdot (\kappa_{\mathcal{M}})^{4/d}$$

where  $\kappa_{\mathcal{M}} := \mu_{|H|}(\mathcal{M})$  is the total root curvature of  $\mathcal{M}$ , and  $\mu_{|H|}$  is the measure associated with the (positive) second fundamental form. The constant  $C$  grows as  $C \sim (d/(2\pi e))^2$  with  $d \rightarrow \infty$ .

For the more general problem of approximation of a smooth manifold in a separable Hilbert space, we begin by considering the definitions in Section 4 the second fundamental form  $\Pi$  and its operator norm  $|\Pi_q|$  at a point  $q \in \mathcal{M}$ . Then we have:

**Lemma 3.** *Assume given a  $d$ -manifold  $\mathcal{M}$  with metric in  $\mathcal{C}^3$  embedded in a separable Hilbert space  $\mathcal{X}$ . If  $\mathcal{F}_k$  is the class of sets of  $k$   $d$ -dimensional affine spaces, and  $\mathcal{E}_{\rho,k}^*$  is the minimizer of Equation 1 over  $\mathcal{F}_k$ , then there is a constant  $C$  that depends on  $d$  only, such that*

$$\lim_{k \rightarrow \infty} \mathcal{E}_{\rho,k}^* \cdot k^{4/d} \leq C \cdot (\kappa_{\mathcal{M}})^{4/d}$$

where  $\kappa_{\mathcal{M}} := \int_{\mathcal{M}} d\mu_I(x) \frac{1}{4} |\Pi_x|^2$  and  $\mu_I$  is the volume measure over  $\mathcal{M}$ . The constant  $C$  grows as  $C \sim (d/(2\pi e))^2$  with  $d \rightarrow \infty$ .

We combine these two results into Theorems 3 and 4, whose derivation is in Appendix B.

### C.1 Proofs

We begin proving the bound on the statistical error given in Lemma 1.

*Proof.* We begin by finding uniform upper bounds on the difference between Equations 1 and 2 for the class  $\mathcal{F}_k$  of sets of  $k$   $d$ -dimensional affine spaces. To do this, we will first bound the Rademacher complexity  $\mathcal{R}_n(\mathcal{F}_k, p)$  of the class  $\mathcal{F}_k$ .

Let  $\Phi$  and  $\Psi$  be Gaussian processes indexed by  $\mathcal{F}_k$ , and defined by

$$\begin{aligned} \Phi_{X'} &= \sum_{i=1}^n \gamma_i \min_{j=1}^k d_{\mathcal{X}}^2(x_i, \pi'_j x_i) \\ \Psi_{X'} &= \sum_{i=1}^n \gamma_i \sum_{j=1}^k d_{\mathcal{X}}^2(x_i, \pi'_j x_i) \end{aligned} \tag{21}$$

$X' \in \mathcal{F}_k$ ,  $X'$  is the union of  $k$   $d$ -subspaces:  $X' = \cup_{j=1}^k F_j$ , where each  $\pi'_j$  is an orthogonal projection onto  $F_j$ , and  $\gamma_i$  are independent Gaussian sequences of zero mean and unit variance.

Noticing that  $d_{\mathcal{X}}^2(x, \pi x) = \|x\|^2 - \|\pi x\|^2 = \|x\|^2 - \langle x x^t, \pi \rangle_F$  for any orthogonal projection  $\pi$  (see for instance [5], Sec. 2.1), where  $\langle \cdot, \cdot \rangle_F$  is the Hilbert-Schmidt inner product, we may verify that:

$$\begin{aligned} \mathbb{E}_{\gamma} (\Phi_{X'} - \Phi_{X''})^2 &= \sum_{i=1}^n \left[ \min_{j=1}^k \|x_i\|^2 - \langle x_i x_i^t, \pi'_j \rangle_F - \left( \min_{j=1}^k \|x_i\|^2 - \langle x_i x_i^t, \pi''_j \rangle_F \right) \right]^2 \\ &\leq \sum_{i=1}^n \max_{j=1}^k \left( \langle x_i x_i^t, \pi'_j \rangle_F - \langle x_i x_i^t, \pi''_j \rangle_F \right)^2 \\ &\leq \sum_{i=1}^n \sum_{j=1}^k \left( \langle x_i x_i^t, \pi'_j \rangle_F - \langle x_i x_i^t, \pi''_j \rangle_F \right)^2 = \mathbb{E}_{\gamma} (\Psi_{X'} - \Psi_{X''})^2 \end{aligned} \tag{22}$$

Since it is,

$$\begin{aligned} \mathbb{E}_{\gamma} \sup_{X' \in \mathcal{F}_k} \sum_{i=1}^n \gamma_i \sum_{j=1}^k \langle x_i x_i^t, \pi'_j \rangle_F &= \mathbb{E}_{\gamma} \sup_{X' \in \mathcal{F}_k} \sum_{j=1}^k \left\langle \sum_{i=1}^n \gamma_i x_i x_i^t, \pi'_j \right\rangle_F \\ &\leq k \mathbb{E}_{\gamma} \sup_{\pi} \left\langle \sum_{i=1}^n \gamma_i x_i x_i^t, \pi \right\rangle_F \\ &\leq k \sup_{\pi} \|\pi\|_F \mathbb{E}_{\gamma} \left\| \sum_{i=1}^n \gamma_i x_i x_i^t \right\|_F \leq k \sqrt{dn} \end{aligned} \tag{23}$$

we may bound the Gaussian complexity  $\Gamma_n(\mathcal{F}_k, p)$  as follows:

$$\begin{aligned}\Gamma_n(\mathcal{F}_k, p) &= \frac{2}{n} \mathbb{E}_\gamma \sup_{X' \in \mathcal{F}_k} \sum_{i=1}^n \gamma_i \min_{j=1}^k d_{\mathcal{X}}^2(x_i, \pi'_j x_i) \\ &\leq \frac{2}{n} \mathbb{E}_\gamma \sup_{X' \in \mathcal{F}_k} \sum_{i=1}^n \gamma_i \sum_{j=1}^k \langle x_i x_i^t, \pi'_j \rangle_F \leq 2k \sqrt{\frac{d}{n}}\end{aligned}\tag{24}$$

where the first inequality follows from Equation 22 and Slepian's Lemma [19], and the second from Equation 23.

Therefore the Rademacher complexity is bounded by

$$\mathcal{R}_n(\mathcal{F}_k, p) \leq \sqrt{\pi/2} \Gamma_n(\mathcal{F}_k, p) \leq k \sqrt{\frac{2\pi d}{n}}\tag{25}$$

Finally, by Theorem 8 of [4], it is:

$$\sup_{X' \in \mathcal{F}_k} |\mathcal{E}_\rho(X') - \mathcal{E}_n(X')| \leq \mathcal{R}_n(\mathcal{F}_k, p) + \sqrt{\frac{\ln 1/\delta}{2n}} \leq k \sqrt{\frac{2\pi d}{n}} + \sqrt{\frac{\ln 1/\delta}{2n}}\tag{26}$$

as desired.  $\square$

## C.2 Approximation Error

In order to prove approximation bounds for the k-flats problem, we will begin by first considering the simpler setting of a smooth  $d$ -manifold in  $\mathbb{R}^{d+1}$  space (codimension 1), and later we will extend the analysis to the general case.

### Approximation Error: Codimension One

Assume that it is  $\mathcal{X} = \mathbb{R}^{d+1}$  with the natural metric, and  $\mathcal{M}$  is a compact, smooth  $d$ -manifold with metric of class  $\mathcal{C}^2$ . Since  $\mathcal{M}$  is of codimension one, the second fundamental form at each point is a map from the tangent space to the reals. Assume given  $\alpha > 0$  and  $\lambda > 0$ . At every point  $x \in \mathcal{M}$ , define the metric  $Q_x := |\Pi_x| + \alpha'(x)I_x$ , where

- a) I and II are, respectively, the first and second fundamental forms on  $\mathcal{M}$  [9].
  - b)  $|\Pi|$  is the *convexified* second fundamental form, whose eigenvalues are those of  $\Pi$  but in absolute value. If the second fundamental form  $\Pi$  is written in coordinates (with respect to an orthonormal basis of the tangent space) as  $S\Lambda S^T$ , with  $S$  orthonormal, and  $\Lambda$  diagonal, then  $|\Pi|$  is  $S|\Lambda|S^T$  in coordinates. Because  $|\Pi|$  is continuous and positive semi-definite, it has an associated measure  $\mu_{|\Pi|}$  (with respect to the volume measure  $\mu_I$ ).
  - c)  $\alpha'(x) > 0$  is chosen such that  $d\mu_{Q_x}/d\mu_I = d\mu_{|\Pi|}/d\mu_I + \alpha$ . Note that such  $\alpha'(x) > 0$  always exists since:
    - $\alpha'(x) = 0$  implies  $d\mu_{Q_x}/d\mu_I = d\mu_{|\Pi|}/d\mu_I$ , and
    - $d\mu_{Q_x}/d\mu_I$  can be made arbitrarily large by increasing  $\alpha'(x)$ .
- and therefore there is some intermediate value of  $\alpha'(x) > 0$  that satisfies the constraint.

In particular, from condition c), it is clear that  $Q$  is everywhere positive definite.

Let  $\mu_I$  and  $\mu_Q$  be the measures over  $\mathcal{M}$ , associated with I and  $Q$ . Since, by its definition,  $\mu_I$  is absolutely continuous with respect to I, then so must  $Q$  be. Therefore, we may define

$$\omega_Q := d\mu_Q/d\mu_I$$

to be the density of  $\mu_Q$  with respect to  $\mu_I$ .

Consider the discrete set  $P_k \subset \mathcal{M}$  of size  $k$  that minimizes the quantity

$$f_{Q,p}(P_k) = \int_{\mathcal{M}} d\mu_Q(x) \left[ \frac{p(x)}{\omega_Q(x)} \right] \min_{p \in P_k} d_Q^4(x, p)\tag{27}$$

among all sets of  $k$  points on  $\mathcal{M}$ .  $f_{Q,p}(P_k)$  is the (fourth-order) quantization error over  $\mathcal{M}$ , with metric  $Q$ , and with respect to a weight function  $p/\omega_Q$ . Note that, in the definition of  $f_{Q,p}(P_k)$ , it is crucial that the measure  $(\mu_Q)$ , and distance  $(d_Q)$  match, in the sense that  $d_Q$  is the geodesic distance with respect to the metric  $Q$ , whose associated measure is  $\mu_Q$ .

The following theorem, adapted from [12], characterizes the relation between  $k$  and the quantization error  $f_{Q,p}(P_k)$  on a Riemannian manifold.

**Theorem 1.** [[12]] *Given a smooth compact Riemannian  $d$ -manifold  $\mathcal{M}$  with metric  $Q$  of class  $\mathcal{C}^1$ , and a continuous function  $w : \mathcal{M} \rightarrow \mathbb{R}^+$ , then*

$$\min_{P \in \mathcal{P}_k} \int_{\mathcal{M}} d\mu_Q(x) w(x) \min_{p \in P} d_Q^r(x, p) \sim C \left\{ \int_{\mathcal{M}} d\mu_Q(x) w(x)^{d/(d+r)} \right\}^{(d+r)/d} \cdot k^{-r/d} \quad (28)$$

as  $k \rightarrow \infty$ , where the constant  $C$  depends only on  $d$ .

Furthermore, for each connected  $\mathcal{M}$ , there is a number  $\xi > 1$  such that each set  $P_k$  that minimizes Equation 28 is a  $(k^{-1/d}/\xi)$ -packing and  $(\xi k^{-1/d})$ -cover of  $\mathcal{M}$ , with respect to  $d_Q$ .

This last result, which shows that a minimizing set  $P_k$  of size  $k$  must be a  $(\xi k^{-1/d})$ -cover, clearly implies, by the definition of Voronoi diagram and the triangle inequality, the following key corollary.

**Corollary 1.** *Given  $\mathcal{M}$ , there is  $\xi > 1$  such that each set  $P_k$  that minimizes Equation 28 has Voronoi regions of diameter no larger than  $2\xi k^{-1/d}$ , as measured by the distance  $d_Q$ .*

Let each  $P_k \subset \mathcal{M}$  be a minimizer of Equation 27 of size  $k$ , then, for each  $k$ , define  $F_k$  to be the union of  $(d$ -dimensional affine) tangent spaces to  $\mathcal{M}$  at each  $q \in P_k$ , that is,  $F_k := \cup_{q \in P_k} T_q \mathcal{M}$ . We may now use the definition of  $P_k$  to bound the approximation error  $\mathcal{E}_\rho(F_k)$  on this set.

We begin by establishing some results that link distance to tangent spaces on manifolds to the geodesic distance  $d_Q$  associated with  $Q$ . The following lemma appears (in a slightly different form) as Lemma 4.1 in [7], and is borrowed from [12, 11].

**Lemma 4.** [[12, 11], [7]] *Given  $\mathcal{M}$  as above, and  $\lambda > 0$  then, for every  $p \in \mathcal{M}$  there is an open neighborhood  $V_\lambda(p) \ni p$  in  $\mathcal{M}$  such that, for all  $x, y \in V_\lambda(p)$ , it is*

$$d_{\mathcal{X}}^2(x, T_y \mathcal{M}) \leq (1 + \lambda) d_{|\text{II}|}^4(x, y) \quad (29)$$

where  $d_{\mathcal{X}}(x, T_y \mathcal{M})$  is the distance from  $x$  to the tangent plane  $T_y \mathcal{M}$  at  $y$ , and  $d_{|\text{II}|}$  is the geodesic distance associated with the convexified second fundamental form.

From the definition of  $Q$ , it is clear that, because  $Q$  strictly dominates  $|\text{II}|$  then, for points  $x, y$  satisfying the conditions of Equation 29, it must be  $d_{\mathcal{X}}(x, T_y \mathcal{M}) \leq (1 + \lambda) d_{|\text{II}|}(x, y) \leq (1 + \lambda) d_Q(x, y)$ .

Given our choice of  $\lambda > 0$ , Lemma 4 implies that there is a collection of  $k$  neighborhoods, centered around the points  $p \in P_k$ , such that Equation 29 holds inside each. However, these neighborhoods may be too small for our purposes. In order to apply Lemma 4 to our problem, we will need to prove a stronger condition. We begin by considering the Dirichlet-Voronoi regions  $D_{\mathcal{M},Q}(p; P_k)$  of points  $p \in P_k$ , with respect to the distance  $d_Q$ . That is,

$$D_{\mathcal{M},Q}(p; P_k) = \{x \in \mathcal{M} : d_Q(x, p) \leq d_Q(x, q), \forall q \in P_k\}$$

where, as before,  $P_k$  is a set of size  $k$  minimizing Equation 27.

**Lemma 5.** *For each  $\lambda > 0$ , there is  $k'$  such that, for all  $k \geq k'$ , and all  $q \in P_k$ , Equation 29 holds for all  $x, y \in D_{\mathcal{M},Q}(q; P_k)$ .*

**Remark** Note that, if it were  $P'_k \subset P_k$  with  $k > k'$  (if each  $P_{k+1}$  were constructed by adding one point to  $P_k$ ), then Lemma 5 would follow automatically from Lemma 4 and Corollary 1. Since, in general, this not the case, the following proof is needed.

*Proof.* It suffices to show that every Voronoi region  $D_{\mathcal{M},Q}(q; P_k)$ , for sufficiently large  $k$ , is contained in a neighborhood  $V_\lambda(v_q)$  of the type described in Lemma 4, for some  $v_q \in \mathcal{M}$ .

Clearly, by Lemma 4, the set  $C = \{V_\lambda(x) : x \in \mathcal{M}\}$  is an open cover of  $\mathcal{M}$ . Since  $\mathcal{M}$  is compact,  $C$  admits a finite subcover  $C'$ . By the Lebesgue number lemma, there is  $\delta > 0$  such that every set in  $\mathcal{M}$  of diameter less than  $\delta$  is contained in some open set of  $C'$ .

Now let  $k' = \lceil (\delta/2\xi)^{-d} \rceil$ . By Corollary 1, every Voronoi region  $D_{\mathcal{M},Q}(q; P_k)$ , with  $q \in P_k$ ,  $k \geq k'$ , has diameter less than  $\delta$ , and is therefore contained in some set of  $C'$ . Since Equation 29 holds inside every set of  $C'$  then, in particular, it holds inside  $D_{\mathcal{M},Q}(q; P_k)$ .  $\square$

We now have all the tools needed to prove:

**Lemma 2** *If  $\mathcal{F}_k$  is the class of sets of  $k$   $d$ -dimensional affine spaces, and  $\mathcal{E}_{\rho,k}^*$  is the minimizer of Equation 1 over  $\mathcal{F}_k$ , then there is a constant  $C$  that depends on  $d$  only, such that*

$$\lim_{k \rightarrow \infty} \mathcal{E}_{\rho,k}^* \cdot k^{4/d} \leq C \cdot (\kappa_{\mathcal{M}})^{4/d}$$

where  $\kappa_{\mathcal{M}} := \mu_{|\Pi|}(\mathcal{M})$  is the total root curvature of  $\mathcal{M}$ . The constant  $C$  grows as  $C \sim (d/(2\pi e))^2$  with  $d \rightarrow \infty$ .

*Proof.* Pick  $\alpha > 0$  and  $\lambda > 0$ . Given  $P_k$  minimizing Equation 27, if  $F_k$  is the union of tangent spaces at each  $p \in P_k$ , by Lemmas 4 and 5, it is

$$\begin{aligned} \mathcal{E}_\rho(F_k) &= \int_{\mathcal{M}} d\mu_1(x) p(x) \min_{p \in P_k} d_x^2(x, T_p \mathcal{M}) \\ &\leq (1 + \lambda) \int_{\mathcal{M}} d\mu_1(x) p(x) \min_{p \in P_k} d_Q^4(x, p) \\ &= (1 + \lambda) \int_{\mathcal{M}} d\mu_Q(x) \frac{p(x)}{\omega_Q(x)} \min_{p \in P_k} d_Q^4(x, p) \\ &\stackrel{\text{Thm. 1, } r=4}{\leq} (1 + \lambda) C \left\{ \int_{\mathcal{M}} d\mu_Q(x) \left[ \frac{p(x)}{\omega_Q(x)} \right]^{d/(d+4)} \right\}^{(d+4)/d} \cdot k^{-4/d} \end{aligned} \tag{30}$$

where the last line follows from the fact that  $P_k$  has been chosen to minimize Equation 27, and where, in order to apply Theorem 1, we use the fact that  $p$  is absolutely continuous in  $\mathcal{M}$ .

By the definition of  $\omega_Q$ , it follows that

$$\begin{aligned} \left\{ \int_{\mathcal{M}} d\mu_Q(x) \left[ \frac{p(x)}{\omega_Q(x)} \right]^{d/(d+4)} \right\}^{(d+4)/d} &= \left\{ \int_{\mathcal{M}} d\mu_1(x) \omega_Q(x)^{4/(d+4)} p(x)^{d/(d+4)} \right\}^{(d+4)/d} \\ &\leq \left\{ \int_{\mathcal{M}} d\mu_1(x) \omega_Q(x) \right\}^{4/d} \end{aligned} \tag{31}$$

where the last line follows from Hölder's inequality ( $\|fg\|_1 \leq \|f\|_p \|g\|_q$  with  $p = (d+4)/d > 1$ , and  $q = (d+4)/4$ .)

Finally, by the definition of  $Q$  and  $\alpha'$ , it is

$$\int_{\mathcal{M}} d\mu_1(x) \omega_Q(x) \leq \int_{\mathcal{M}} d\mu_1(x) \alpha + \int_{\mathcal{M}} d\mu_{|\Pi|}(x) = \alpha \mathcal{V}_{\mathcal{M}} + \kappa_{\mathcal{M}} \tag{32}$$

where  $\mathcal{V}_{\mathcal{M}}$  is the total volume of  $\mathcal{M}$ , and  $\kappa_{\mathcal{M}} := \mu_{|\Pi|}(\mathcal{M})$  is the total root curvature of  $\mathcal{M}$ . Therefore

$$\mathcal{E}_\rho(F_k) \leq (1 + \lambda) C \{ \alpha \mathcal{V}_{\mathcal{M}} + \kappa_{\mathcal{M}} \}^{4/d} \cdot k^{-4/d} \tag{33}$$

Since  $\alpha > 0$  and  $\lambda > 0$  are arbitrary, Lemma 2 follows.

Finally, we discuss an important technicality in the proof that we hadn't mentioned before in the interest of clarity of exposition. Because we are taking absolute values in its definition,  $Q$  is not necessarily of class  $\mathcal{C}^1$ , even if  $\Pi$  is. Therefore, we may not apply Theorem 1 directly. We may, however, use Whitney's approximation theorem (see for example [14] p. 252), to obtain a smooth

$\epsilon$ -approximation to  $Q$ , which can be enforced to be positive definite by relating the choice of  $\epsilon$  to that of  $\alpha$ , and with  $\epsilon \rightarrow 0$  as  $\alpha \rightarrow 0$ . Since the  $\epsilon$ -approximation  $Q$  only affects the final performance (Equation 33) by at most a constant times  $\epsilon$ , then the fact that  $\alpha$  is arbitrarily (and hence so is  $\epsilon$ ) implies the lemma.  $\square$

### Approximation Error: General Case

Assume given a  $d$ -manifold  $\mathcal{M}$  with metric in  $\mathcal{C}^3$  embedded in a separable Hilbert space  $\mathcal{X}$ . Consider the definition in Section 4 of the second fundamental form  $\Pi$  and its operator norm  $|\Pi|$ .

We begin extending the results of Lemma 4 to the general case, where the manifold is embedded in a possibly infinite-dimensional ambient space. In this case, the orthogonal complement  $(T_x\mathcal{M})^\perp$  to the tangent space at  $x \in \mathcal{M}$  may be infinite-dimensional (although, by the separability of  $\mathcal{X}$ , it has a countable basis.)

For each  $x \in \mathcal{M}$ , consider the largest  $x$ -centered ball  $B_x(\varepsilon)$  for which there is a smooth one-to-one Monge patch  $m_x : B_x(\varepsilon_x) \subset T_x\mathcal{M} \rightarrow \mathcal{M}$ . Since  $\mathcal{M}$  is smooth, and  $\Pi$  bounded, by the inverse function theorem it holds  $\varepsilon_x > 0$ . Because  $\Pi \in \mathcal{C}^1$ , we can always choose  $\varepsilon_x$  to be continuous in  $\mathcal{M}$ , and thus by the compactness of  $\mathcal{M}$  there is a minimum  $0 < \varepsilon$  such that  $0 < \varepsilon \leq \varepsilon_x$  with  $x \in \mathcal{M}$ . Let  $N_x(\delta)$  denote the geodesic neighborhood around  $x \in \mathcal{M}$  of radius  $\delta$ . We begin by proving the following technical Lemma.

**Lemma 6.** *For every  $q \in \mathcal{M}$ , there is  $\delta_q$  such that, for all  $x, y \in N_q(\delta_q)$ , it is  $x \in m_y(B_y(\varepsilon))$  ( $x$  is in the Monge patch of  $y$ ).*

*Proof.* The Monge function  $m_y : B_y(\varepsilon) \rightarrow \mathcal{M}$  is such that  $r \in B_y(\varepsilon)$  implies  $m_y(r) - (y + r) \in (T_y\mathcal{M})^\perp$  (with the appropriate identification of vectors in  $\mathcal{X}$  and in  $(T_y\mathcal{M})^\perp$ ), and therefore for all  $r \in B_y(\varepsilon)$  it holds

$$d_I(y, m_y(r)) \geq \|m_y(r) - y\|_{\mathcal{X}} = \|m_y(r) - (y + r) + (y + r) - y\|_{\mathcal{X}} = \|m_y(r) - (y + r)\|_{\mathcal{X}} + \|r\|_{\mathcal{X}} \geq \|r\|_{\mathcal{X}}$$

Therefore  $N_y(\varepsilon) \subset m_y(B_y(\varepsilon))$ .

For each  $q \in \mathcal{M}$ , the geodesic ball  $N_q(\varepsilon/2)$  is such that, by the triangle inequality, for all  $x, y \in N_q(\varepsilon/2)$  it is  $d_I(x, y) \leq \varepsilon$ . Therefore  $x \in N_y(\varepsilon) \subset m_y(B_y(\varepsilon))$ .  $\square$

**Lemma 7.** *For all  $\lambda > 0$  and  $q \in \mathcal{M}$ , there is a neighborhood  $V \ni q$  such that, for all  $x, y \in V$  it is*

$$d_{\mathcal{X}}^2(x, T_y\mathcal{M}) \leq (1 + \lambda) d_I^4(x, y) |\Pi_x|^2 \quad (34)$$

*Proof.* Let  $V$  be a geodesic neighborhood of radius smaller than  $\varepsilon$ , so that Lemma 6 holds. Define the extension  $\Pi_x^*(r) = \Pi_x^*(r^t + r^\perp) := \Pi_x(r^t)$  of the second fundamental form to  $\mathcal{X}$ , where  $r^t \in T_x\mathcal{M}$  and  $r^\perp \in (T_x\mathcal{M})^\perp$  is the unique decomposition of  $r \in \mathcal{X}$  into tangent and orthogonal components.

By Lemma 6, given  $x, y \in V$ ,  $x$  is in the (one-to-one) Monge patch  $m_y$  of  $y$ . Let  $x' \in T_y\mathcal{M}$  be the unique point such that  $m_y(x') = x$ , and let  $r := (x' - y)/\|x' - y\|_{\mathcal{X}}$ . Since the domain of  $m_y$  is convex, the curve  $\gamma_{y,r} : [0, \|x' - y\|_{\mathcal{X}}] \rightarrow \mathcal{M}$  given by

$$\gamma_{y,r}(t) = y + tr + m_y(tr) = y + tr + \frac{1}{2}t^2\Pi_y(r) + o(t^2)$$

is well-defined, where the last equality follows from the smoothness of  $\Pi$ . Clearly,  $\gamma_{y,r}(\|x' - y\|_{\mathcal{X}}) = x$ .

For  $0 \leq t \leq \|x' - y\|_{\mathcal{X}}$  the length of  $\gamma_{y,r}([0, t])$  is

$$L(\gamma_{y,r}([0, t])) = \int_0^t d\tau \|\dot{\gamma}_{y,r}(\tau)\|_{\mathcal{X}} = \int_0^t d\tau (\|r\|_{\mathcal{X}} + O(t)) = t \cdot (1 + o(1)) \quad (35)$$

(where  $o(1) \rightarrow 0$  as  $t \rightarrow 0$ .) This establishes the closeness of distances in  $T_y\mathcal{M}$  to geodesic distance on  $\mathcal{M}$ . In particular, for any  $\alpha > 0$ ,  $y \in \mathcal{M}$ , there is a sufficiently small geodesic neighborhood  $N \ni y$  such that, for  $x \in N$ , it holds

$$\|x' - y\|_{\mathcal{X}} \leq \|x - y\|_{\mathcal{X}} \leq d_I(x, y) \leq (1 + \lambda) \|x' - y\|_{\mathcal{X}}$$



By the smoothness of  $\Pi$ , for  $y \in \mathcal{M}$  and  $x \in N_y(\delta_y)$ , with  $0 < \delta_y < \varepsilon$ , it is

$$\begin{aligned} d_{\mathcal{X}}^2(x, T_y \mathcal{M}) &= d_{\mathcal{X}}^2(\gamma_{y,r}(\|x' - y\|_{\mathcal{X}}), T_y \mathcal{M}) = \left\| \frac{1}{2} \Pi_y(r) \|x' - y\|_{\mathcal{X}}^2 + o(\|x' - y\|_{\mathcal{X}}^2) \right\|^2 \\ &= \left\| \frac{1}{2} \Pi_y^*(x - y) + o(\delta_y^2) \right\|^2 \end{aligned}$$

and therefore for any  $\alpha > 0$ , there is a sufficiently small  $0 < \delta_{y,\alpha} < \varepsilon$  such that, given any  $x \in N_y(\delta_{y,\alpha})$ , it is

$$d_{\mathcal{X}}^2(x, T_y \mathcal{M}) \leq (1 + \alpha) \left\| \frac{1}{2} \Pi_y^*(x - y) \right\|^2 \quad (36)$$

By the smoothness of  $\Pi$ , and the same argument as in Lemma 6, there is a continuous choice of  $0 < \delta_{y,\alpha}$ , and therefore a minimum value  $0 < \delta_{\alpha} \leq \delta_{y,\alpha}$ , for  $y \in \mathcal{M}$ .

Similarly, by the smoothness of  $\Pi^*$ , for any  $\alpha > 0$  and  $y \in \mathcal{M}$ , there is a sufficiently small  $\beta_{y,\alpha} > 0$  such that, for all  $x \in N_y(\beta_{y,\alpha})$ , it holds

$$\left\| \frac{1}{2} \Pi_y^*(y - x) \right\|^2 \leq (1 + \alpha) \left\| \frac{1}{2} \Pi_x^*(y - x) \right\|^2 \quad (37)$$

By the argument of Lemma 6, there is a continuous choice of  $0 < \beta_{y,\alpha}$ , and therefore a minimum value  $0 < \beta_{\alpha} \leq \beta_{y,\alpha}$ , for  $y \in \mathcal{M}$ .

Finally, let  $\alpha = \lambda/4$ , and restrict  $0 < \lambda < 1$  (larger  $\lambda$  are simply less restrictive.) For each  $q \in \mathcal{M}$ , let  $V = N_q(\min\{\delta_{\alpha}, \beta_{\alpha}\}/2) \ni q$  be a sufficiently small geodesic neighborhood such that, for all  $x, y \in V$ , Eqs. 36 and 37 hold.

Since  $\alpha = \lambda/4 < 1/4$ , it is clearly  $(1 + \alpha)^2 \leq (1 + \lambda)$ , and therefore

$$\begin{aligned} d_{\mathcal{X}}^2(x, T_y \mathcal{M}) &\leq (1 + \alpha) \left\| \frac{1}{2} \Pi_y^*(y - x) \right\|^2 \leq (1 + \alpha)^2 \left\| \frac{1}{2} \Pi_x^*(y - x) \right\|^2 \\ &\leq (1 + \lambda) \frac{1}{4} \|y - x\|^4 |\Pi_x|^2 \leq (1 + \lambda) \frac{1}{4} d_1^4(x, y) |\Pi_x|^2 \end{aligned} \quad (38)$$

where the second-to-last inequality follows from the definition of  $|\Pi|$ .  $\square$

Note that the same argument as that of Lemma 5 can be used here, with the goal of making sure that, for sufficiently large  $k$ , every Voronoi region of each  $p \in P_k$  in the approximation satisfies Equation 34. We may now finish the proof by using a similar argument to that of the codimension-one case.

Let  $\lambda > 0$ . Consider a discrete set  $P_k \subset \mathcal{M}$  of size  $k$  that minimizes

$$g(P_k) = \int_{\mathcal{M}} d\mu_1(x) \frac{1}{4} p(x) |\Pi_x|^2 \min_{p \in P_k} d_1^4(x, p) \quad (39)$$

Note once again that the distance and measure in Equation 39 match and therefore, since  $p(x) |\Pi_x|^2 / 4$  is continuous, we can apply Theorem 1 (with  $r = 4$ ) in this case.

Let  $F_k := \cup_{q \in P_k} T_q \mathcal{M}$ . By Lemma 7 and Lemma 5, adapted to this case, there is  $k'$  such that for all  $k \geq k'$  it is

$$\begin{aligned} \mathcal{E}_{\rho}(F_k) &= \int_{\mathcal{M}} d\mu_1(x) \frac{1}{4} p(x) \min_{p \in P_k} d_x^2(x, T_p \mathcal{M}) \\ &\leq (1 + \lambda) \int_{\mathcal{M}} d\mu_1(x) \frac{1}{4} p(x) |\Pi_x|^2 \min_{p \in P_k} d_1^4(x, p) \\ &\stackrel{\text{Thm. 1, } r=4}{\leq} (1 + \lambda) C \left\{ \int_{\mathcal{M}} d\mu_1(x) \left[ \frac{1}{4} p(x) |\Pi_x|^2 \right]^{d/(d+4)} \right\}^{(d+4)/d} \cdot k^{-4/d} \end{aligned} \quad (40)$$

where the last line follows from the fact that  $P_k$  has been chosen to minimize Equation 39.

Finally, by Hölder's inequality, it is

$$\begin{aligned} \left\{ \int_{\mathcal{M}} d\mu_1(x) \left[ \frac{1}{4} p(x) |\Pi_x|^2 \right]^{d/(d+4)} \right\}^{(d+4)/d} &\leq \left\{ \int_{\mathcal{M}} d\mu_1(x) p(x) \right\} \left\{ \int_{\mathcal{M}} d\mu_1(x) \left( \frac{1}{4} |\Pi_x|^2 \right)^{d/4} \right\}^{4/d} \\ &= \left\| \frac{1}{4} |\Pi|^2 \right\|_{d/4} \end{aligned}$$

and thus

$$\mathcal{E}_\rho(F_k) \leq (1 + \lambda)C \cdot (\kappa_{\mathcal{M}}/k)^{4/d}$$

where the total curvature  $\kappa_{\mathcal{M}} := \int_{\mathcal{M}} d\mu_1(x) \frac{1}{4} |\Pi_x|^{d/2}$  is the geometric invariant of the manifold (aside from the dimension) that controls the constant in the bound.

Since  $\alpha > 0$  and  $\lambda > 0$  are arbitrary, Lemma 3 follows.

### Proofs of Theorems 3 and 4

We use the results discussed in Section A to obtain the proof of Theorem 3 as follows. The proof of Theorem 4 follows from the derivation in Section A, as well as the argument below, with  $\kappa_{\mathcal{M}}^1$  substituted by  $\kappa_{\mathcal{M}}$ , and is omitted in the interest of brevity.

*Proof.* By Lemmas 1 and 2, with probability  $1 - \delta$ , it is

$$\begin{aligned} \mathcal{E}_\rho(F_{n,k}) &\leq 2n^{-1/2} \left( k\sqrt{2\pi d} + \sqrt{\frac{1}{2} \ln 1/\delta} \right) + C(\kappa_{\mathcal{M}}^1/k)^{4/d} \\ &\leq 2n^{-1/2} k\sqrt{2\pi d} \cdot \sqrt{\frac{1}{2} \ln 1/\delta} + C(\kappa_{\mathcal{M}}^1/k)^{4/d} \\ &= 2(8\pi d)^{2/(d+4)} C^{d/(d+4)} \cdot n^{-2/(d+4)} \cdot \sqrt{\frac{1}{2} \ln 1/\delta} \cdot (\kappa_{\mathcal{M}}^1)^{4/(d+4)} \end{aligned} \quad (41)$$

where the last line follows from choosing  $k$  to balance the two summands of the second line, as:

$$k_n = n^{\frac{d}{2(d+4)}} \cdot \left( \frac{C}{2\sqrt{2\pi d}} \right)^{d/(d+4)} \cdot (\kappa_{\mathcal{M}}^1)^{4/(d+4)}$$

□

### References

- [1] Daniel Aloise, Amit Deshpande, Pierre Hansen, and Preyas Popat. Np-hardness of euclidean sum-of-squares clustering. *Mach. Learn.*, 75:245–248, May 2009.
- [2] David Arthur and Sergei Vassilvitskii. k-means++: the advantages of careful seeding. In *Proceedings of the eighteenth annual ACM-SIAM symposium on Discrete algorithms*, SODA '07, pages 1027–1035, Philadelphia, PA, USA, 2007. SIAM.
- [3] Peter L. Bartlett, Tamas Linder, and Gabor Lugosi. The minimax distortion redundancy in empirical quantizer design. *IEEE Transactions on Information Theory*, 44:1802–1813, 1998.
- [4] Peter L. Bartlett and Shahar Mendelson. Rademacher and gaussian complexities: Risk bounds and structural results. *Journal of Machine Learning Research*, 3:463–482, 2002.
- [5] Gilles Blanchard, Olivier Bousquet, and Laurent Zwald. Statistical properties of kernel principal component analysis. *Mach. Learn.*, 66:259–294, March 2007.
- [6] E V Chernaya. On the optimization of weighted cubature formulae on certain classes of continuous functions. *East J. Approx.*, 1995.
- [7] Kenneth L. Clarkson. Building triangulations using  $\epsilon$ -nets. In *Proceedings of the thirty-eighth annual ACM symposium on Theory of computing*, STOC '06, pages 326–335, New York, NY, USA, 2006. ACM.
- [8] Sanjoy Dasgupta and Yoav Freund. Random projection trees for vector quantization. *IEEE Trans. Inf. Theor.*, 55:3229–3242, July 2009.
- [9] M.P. DoCarmo. *Riemannian geometry*. Theory and Applications Series. Birkhäuser, 1992.
- [10] Siegfried Graf and Harald Luschgy. *Foundations of quantization for probability distributions*. Springer-Verlag New York, Inc., Secaucus, NJ, USA, 2000.
- [11] P. M. Gruber. Asymptotic estimates for best and stepwise approximation of convex bodies i. *Forum Mathematicum*, 15:281–297, 1993.
- [12] Peter M. Gruber. Optimum quantization and its applications. *Adv. Math.*, 186:2004, 2002.

- [13] P.M. Gruber. *Convex and discrete geometry*. Grundlehren der mathematischen Wissenschaften. Springer, 2007.
- [14] J.M. Lee. *Introduction to Smooth Manifolds*. Graduate Texts in Mathematics. Springer, 2002.
- [15] Meena Mahajan, Prajakta Nimbhorkar, and Kasturi Varadarajan. The planar k-means problem is np-hard. In *Proceedings of the 3rd International Workshop on Algorithms and Computation, WALCOM '09*, pages 274–285, Berlin, Heidelberg, 2009. Springer-Verlag.
- [16] A. Maurer and M. Pontil. K-dimensional coding schemes in hilbert spaces. *IEEE Transactions on Information Theory*, 56(11):5839–5846, nov. 2010.
- [17] Hariharan Narayanan and Sanjoy Mitter. Sample complexity of testing the manifold hypothesis. In *Advances in Neural Information Processing Systems 23*, pages 1786–1794. MIT Press, 2010.
- [18] David Pollard. Strong consistency of k-means clustering. *Annals of Statistics*, 9(1):135–140, 1981.
- [19] David Slepian. The one-sided barrier problem for Gaussian noise. *Bell System Tech. J.*, 41:463–501, 1962.
- [20] G Fejes Toth. Sur la representation d’une population in par une nombre d’elements. *Acta Math. Acad. Sci. Hungaricae*, 1959.
- [21] Paul L. Zador. Asymptotic quantization error of continuous signals and the quantization dimension. *IEEE Transactions on Information Theory*, 28(2):139–148, 1982.
